# Supplementary material for: Cellulose-reinforced poly(ethylene-co-vinyl acetate)-supported Ag nanoparticles with excellent catalytic properties: synthesis of thioamides using the Willgerodt–Kindler reaction
Source: Royal Society of Chemistry journal article supplement (doi:10.1039/d1ra09225a), 2022-01-01
Supplement: d1ra09225a1.pdf [file d1ra09225a1.pdf]

## Supplementary Information

Cellulose-reinforced poly(ethylene-co-vinyl acetate)-supported  
Ag nanoparticles with excellent catalytic properties: Synthesis  
of thioamides using the Willgerodt–Kindler reaction

*Anoop Singh<sup>a</sup>, Sanjeev Saini<sup>a</sup>, Narinder Singh<sup>a\*</sup>, Navneet Kaur<sup>b\*</sup>, Doo Ok Jang<sup>c\*</sup>*

<sup>a</sup>Department of Chemistry, Indian Institute of Technology Ropar, Punjab 140001, India

<sup>b</sup>Department of Chemistry, Panjab University, Chandigarh 160014, India

<sup>c</sup>Department of Chemistry, Yonsei University, Wonju 26493, Korea

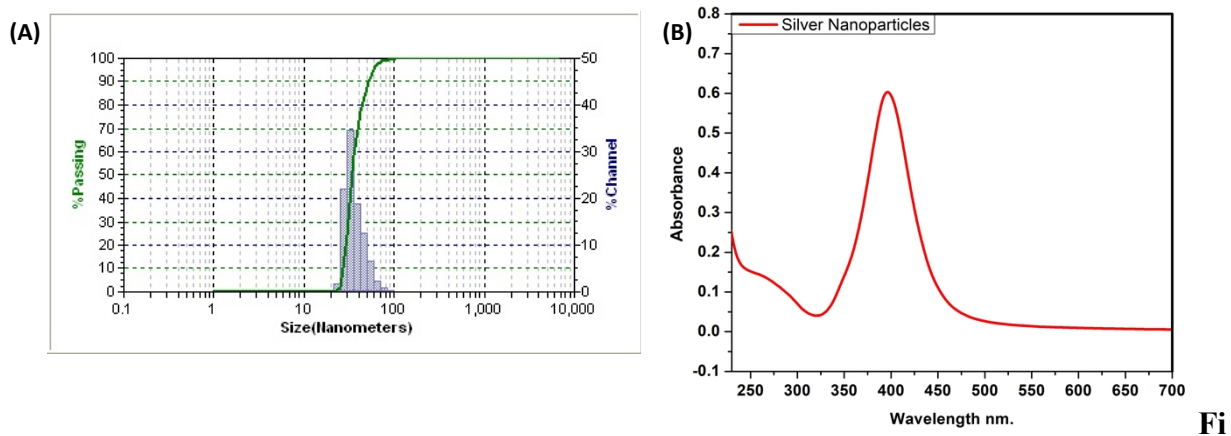

Figure S1. (A) Dynamic light scattering and (B) ultraviolet-visible spectra of Ag nanoparticles.

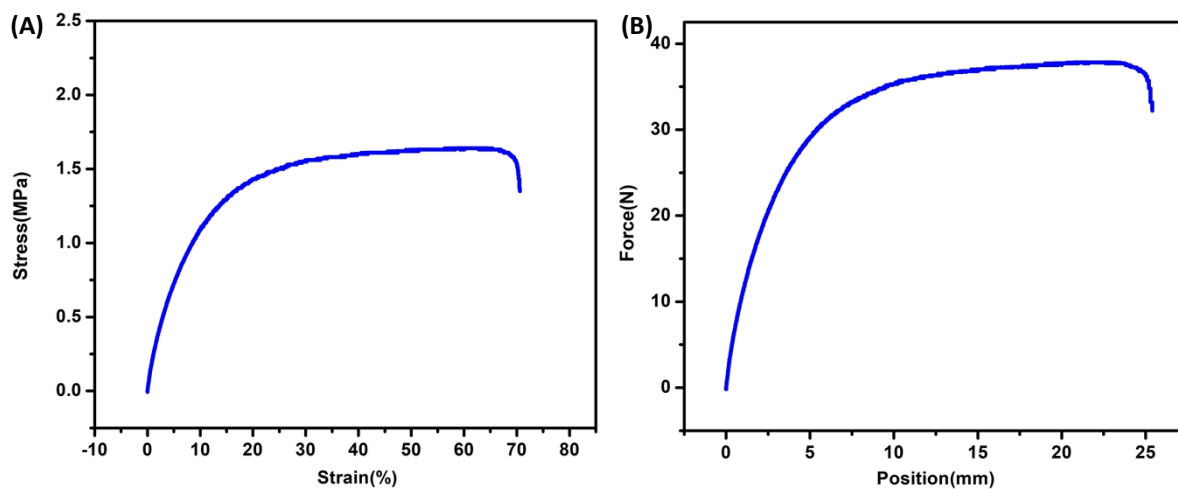

Figure S2. (A) Stress-strain and (B) force-position curves of poly(ethylene-co-vinyl acetate).

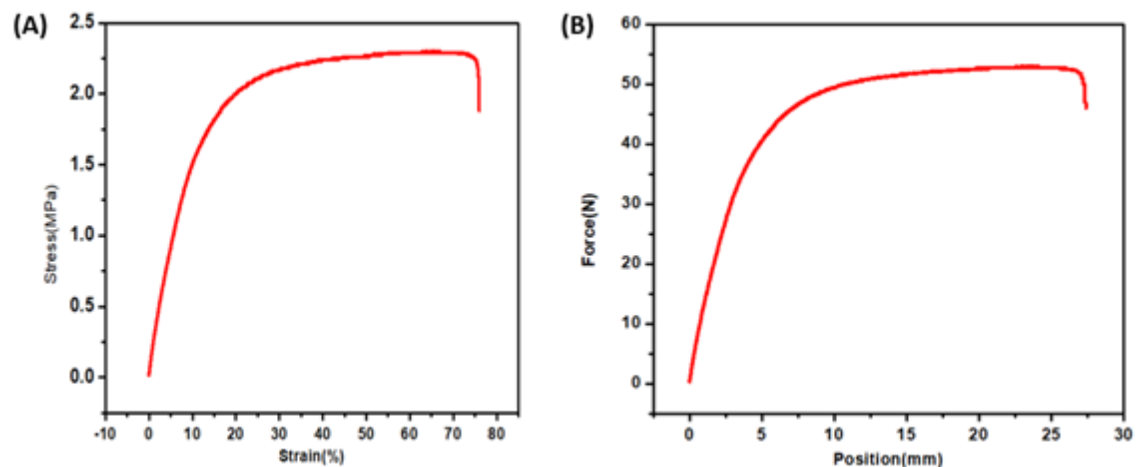

**Figure S3.** (A) Stress–strain and (B) force–position curves of the cellulose–poly(ethylene-co-vinyl acetate) composite.

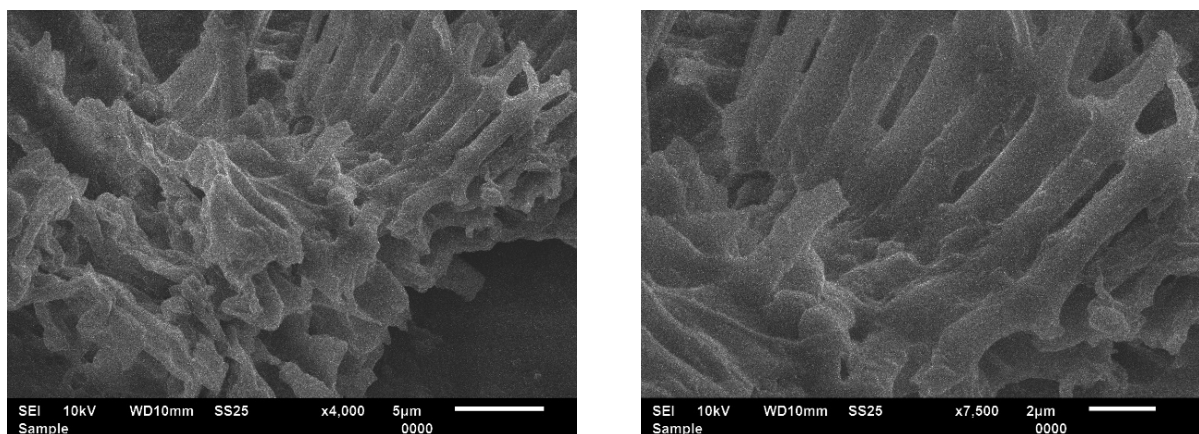

**Figure S4.** Scanning electron micrographs of the AgNPs@cellulose–PEVA after five catalytic cycles at different magnifications. Here, AgNPs and PEVA denote Ag nanoparticles and poly(ethylene-co-vinyl acetate), respectively.

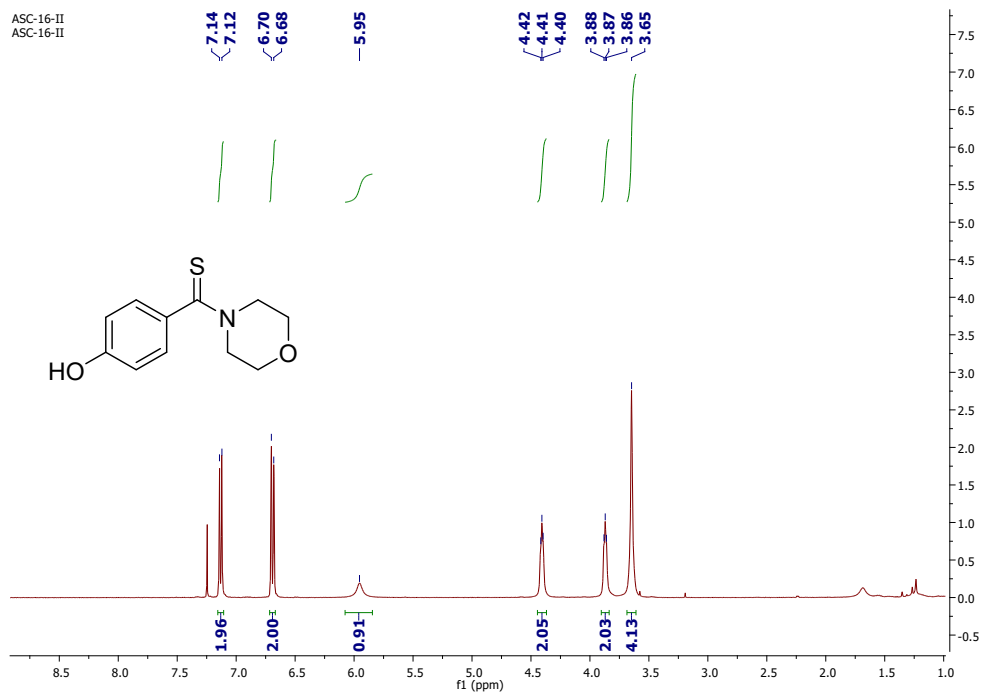

Figure S5.  $^1\text{H}$  NMR ( $\text{CDCl}_3$ ) of 1.

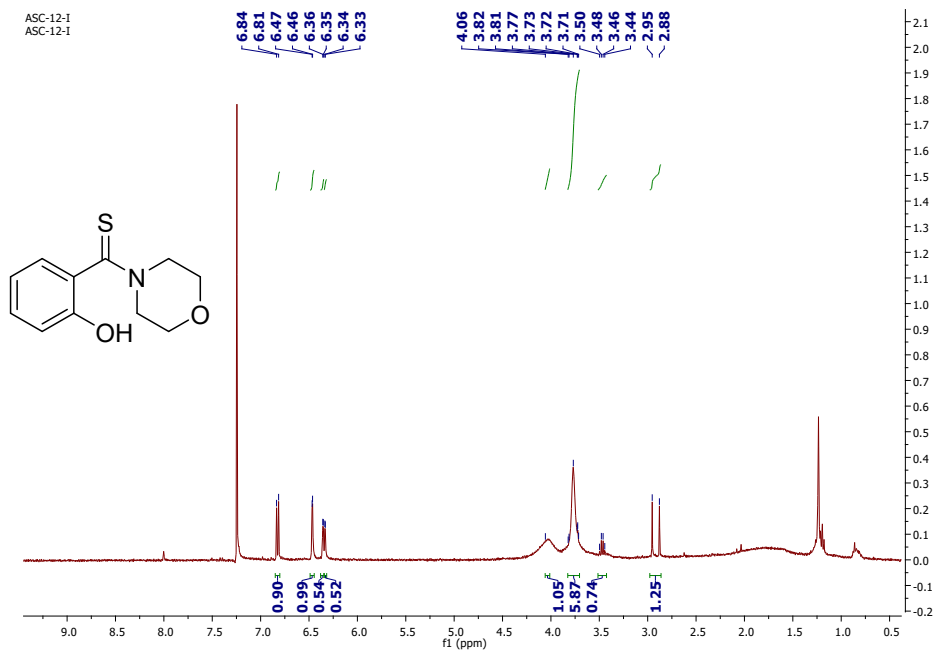

Figure S6.  $^1\text{H}$  NMR ( $\text{CDCl}_3$ ) of 2.

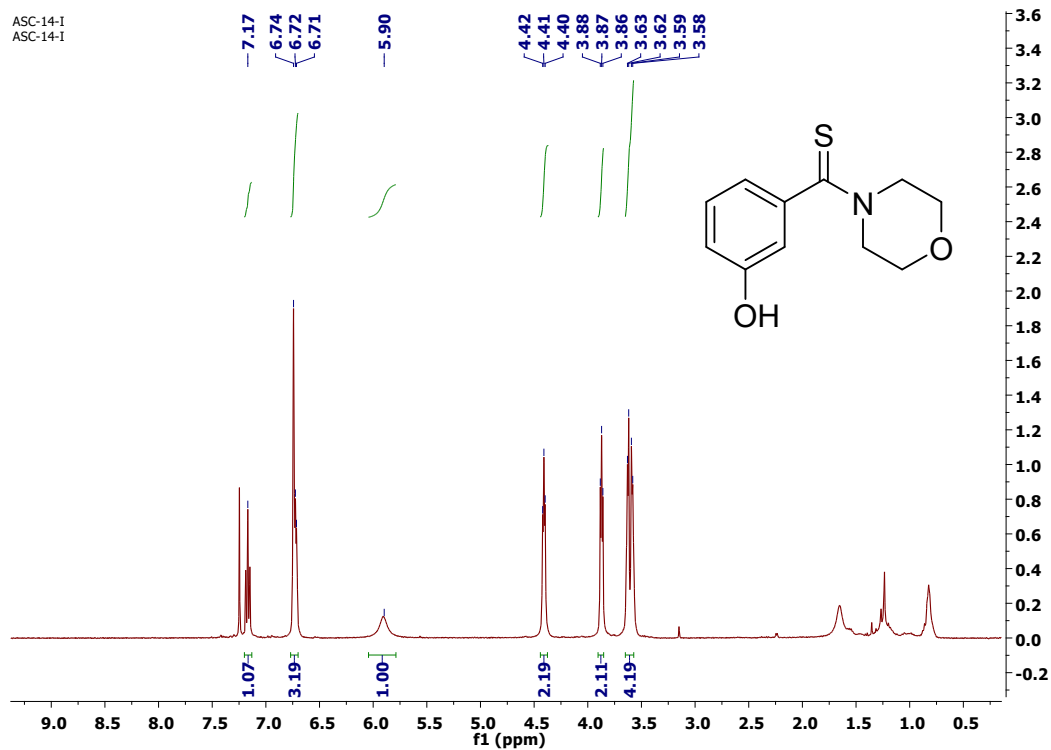

Figure S7.  $^1\text{H}$  NMR ( $\text{CDCl}_3$ ) of 3.

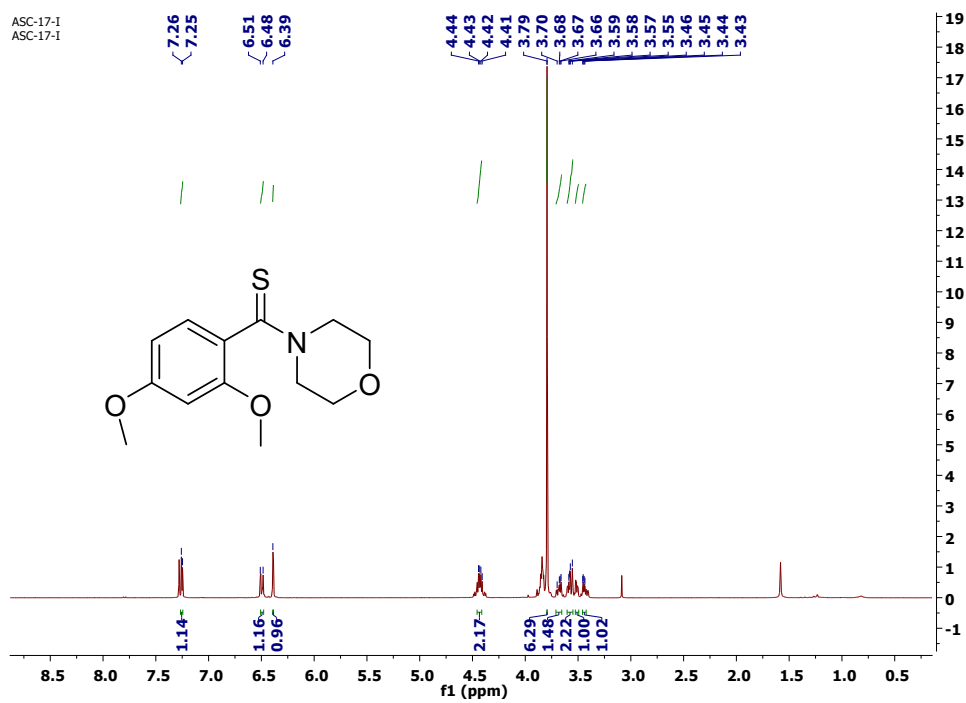

Figure S8.  $^1\text{H}$  NMR ( $\text{CDCl}_3$ ) of 4.

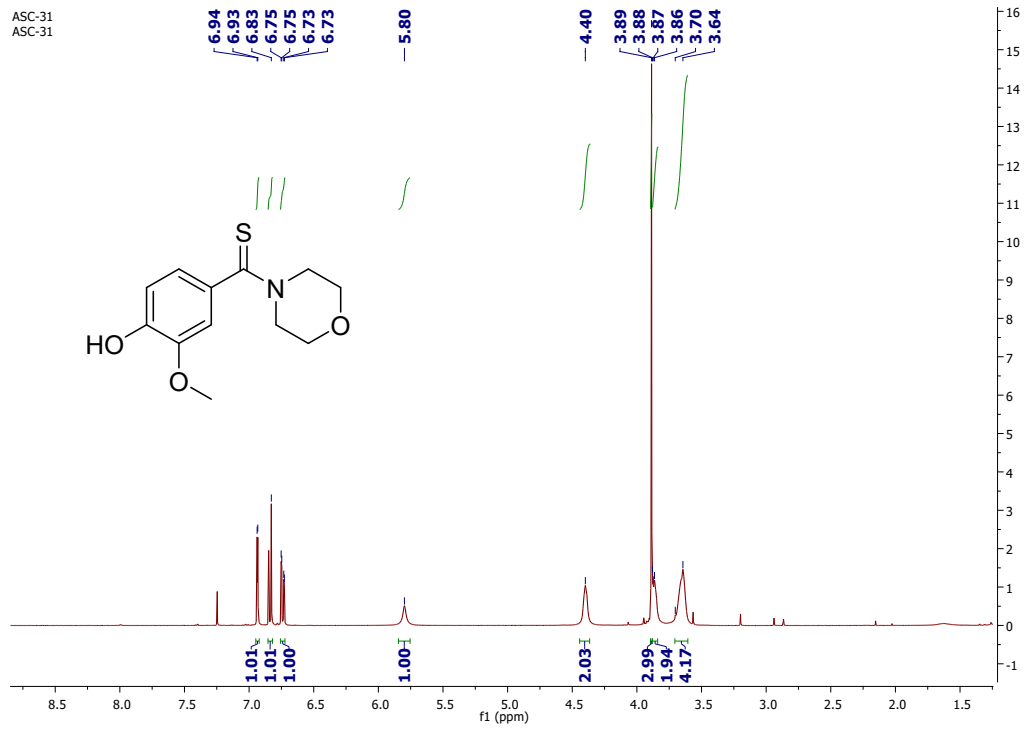

Figure S9.  $^1\text{H}$  NMR ( $\text{CDCl}_3$ ) of 5.

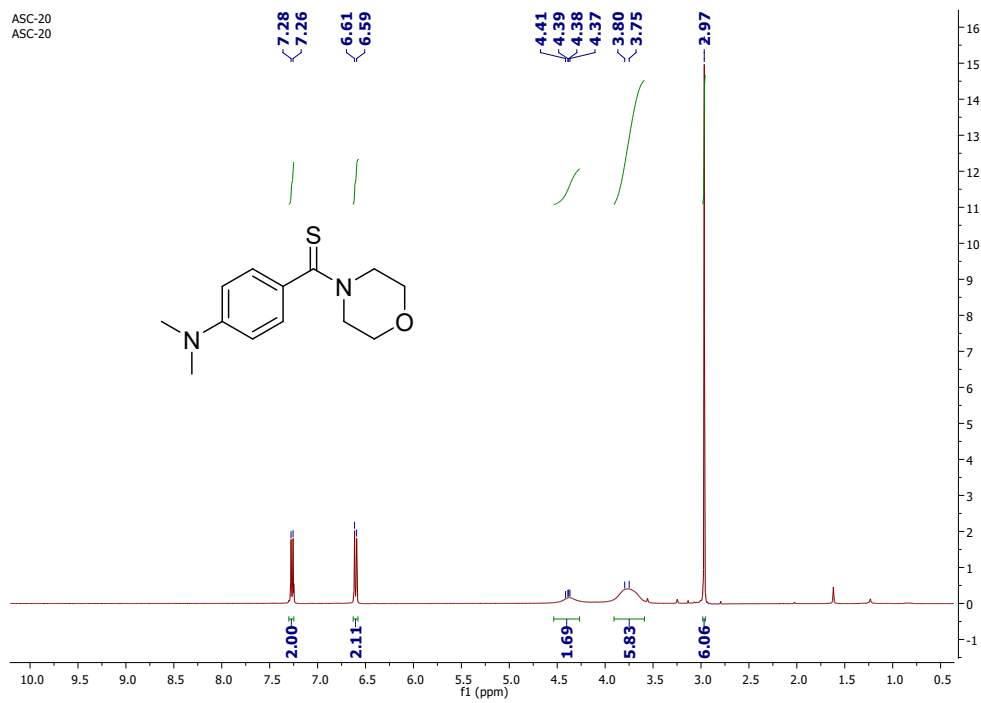

Figure S10.  $^1\text{H}$  NMR ( $\text{CDCl}_3$ ) of 6.

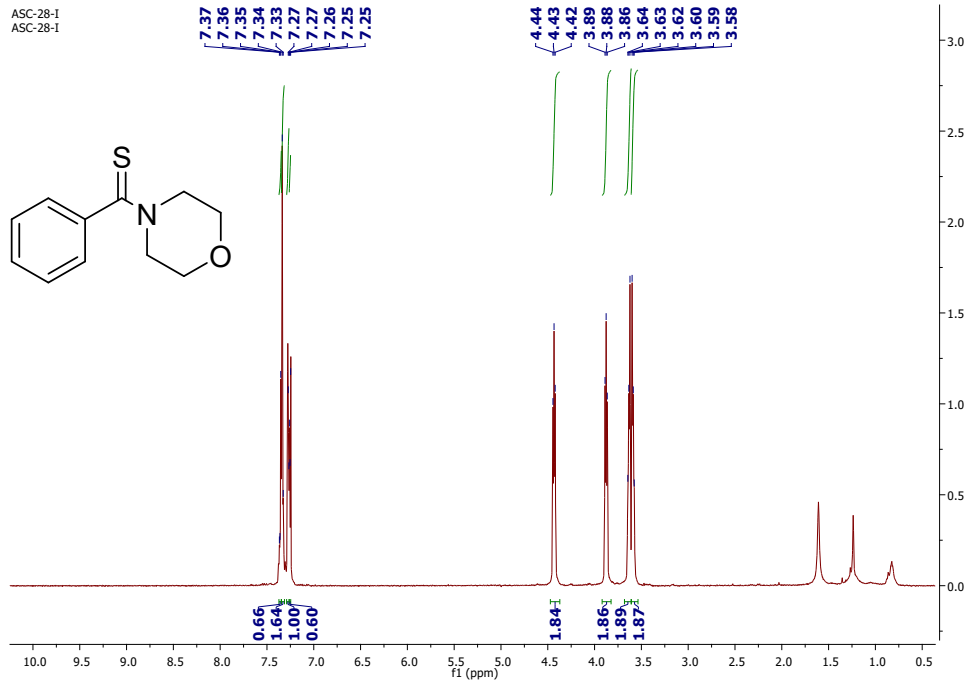

Figure S11.  $^1\text{H}$  NMR ( $\text{CDCl}_3$ ) of **7**.

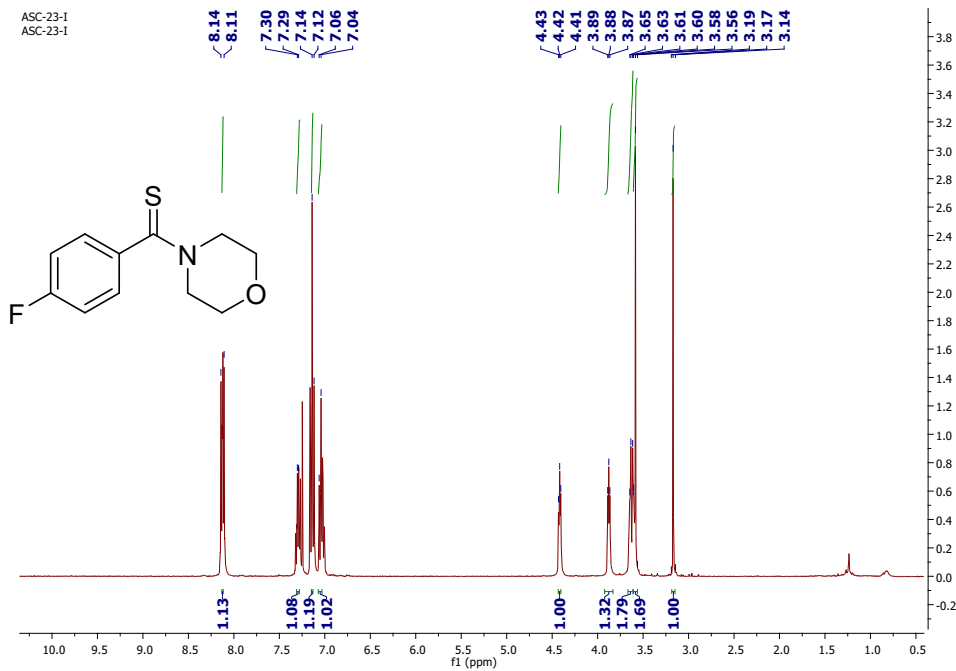

Figure S12.  $^1\text{H}$  NMR ( $\text{CDCl}_3$ ) of **8**.

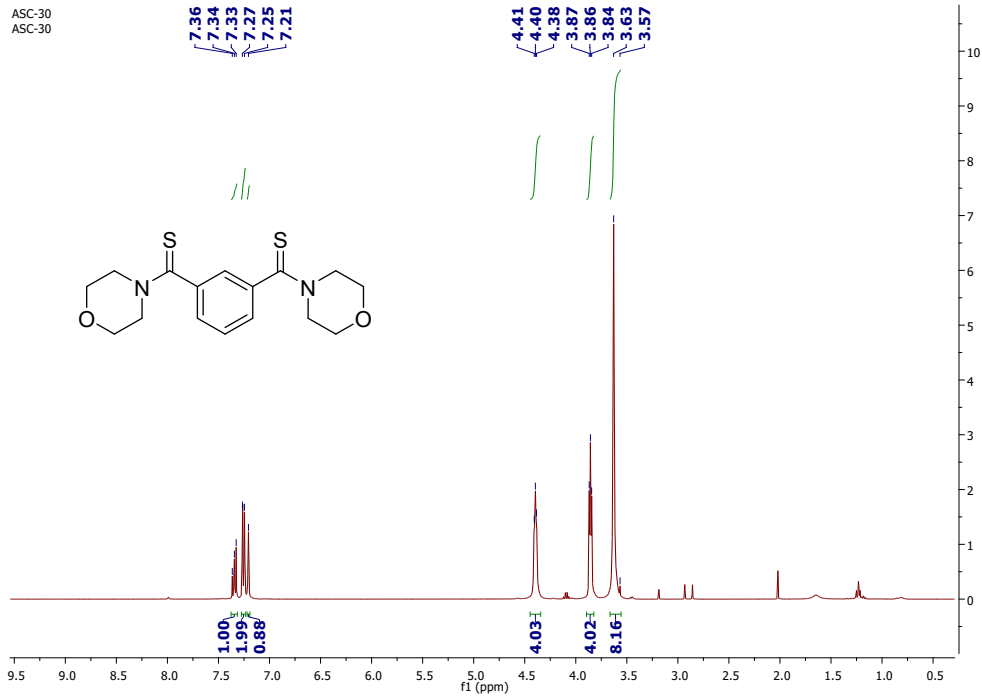

Figure S13.  $^1\text{H}$  NMR ( $\text{CDCl}_3$ ) of **9**.

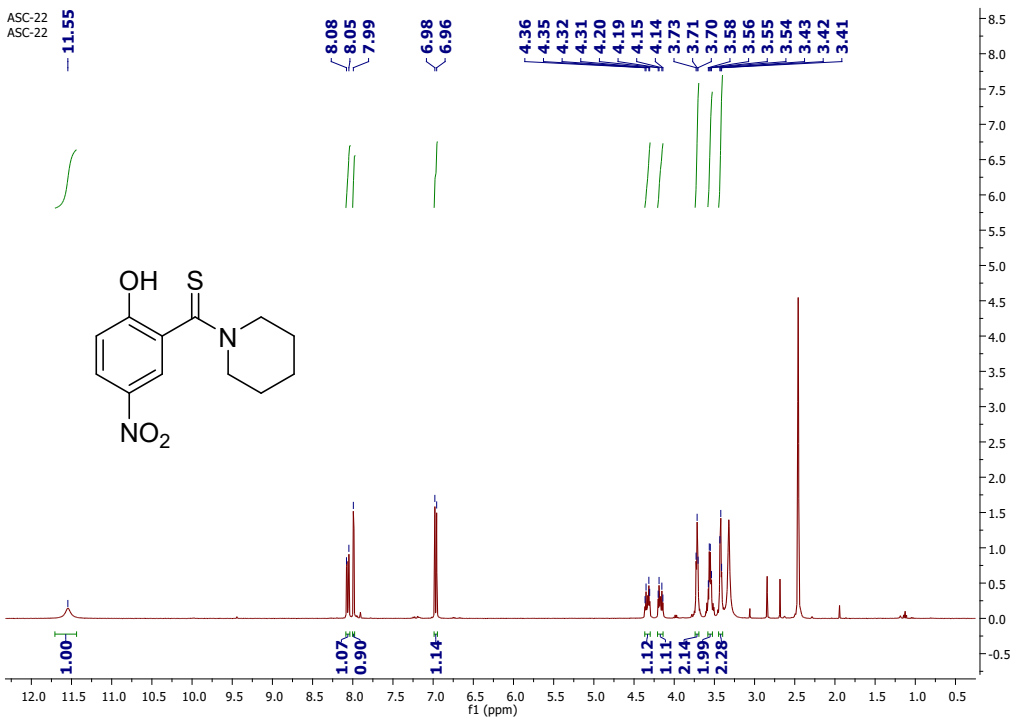

Figure S14.  $^1\text{H}$  NMR ( $\text{CDCl}_3$ ) of **10**.



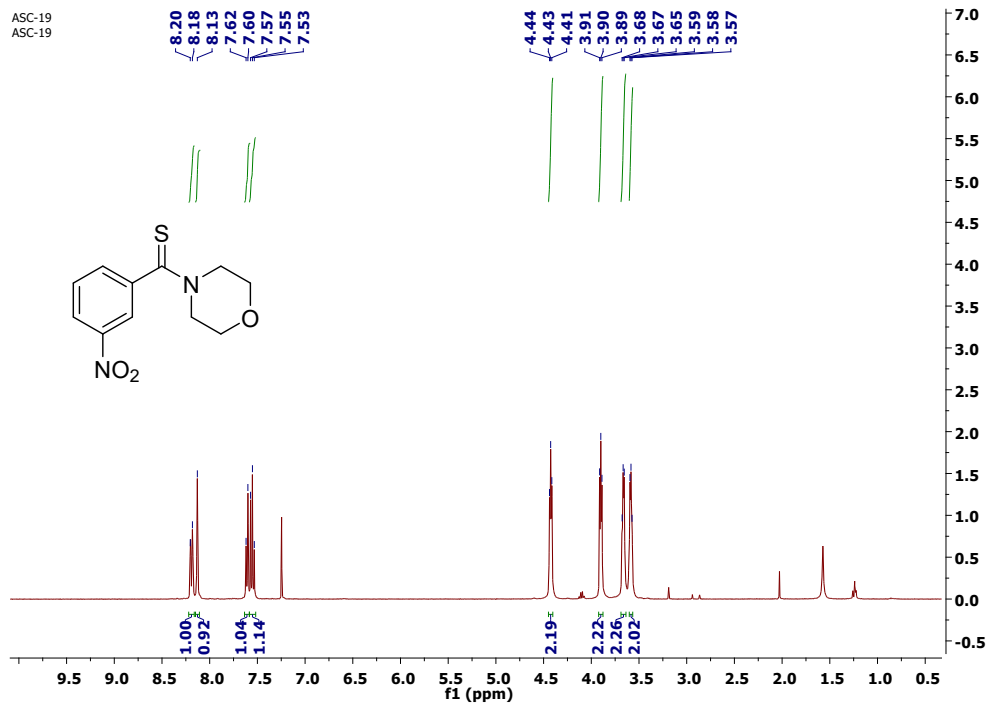

Figure S15.  $^1\text{H}$  NMR ( $\text{CDCl}_3$ ) of 11.

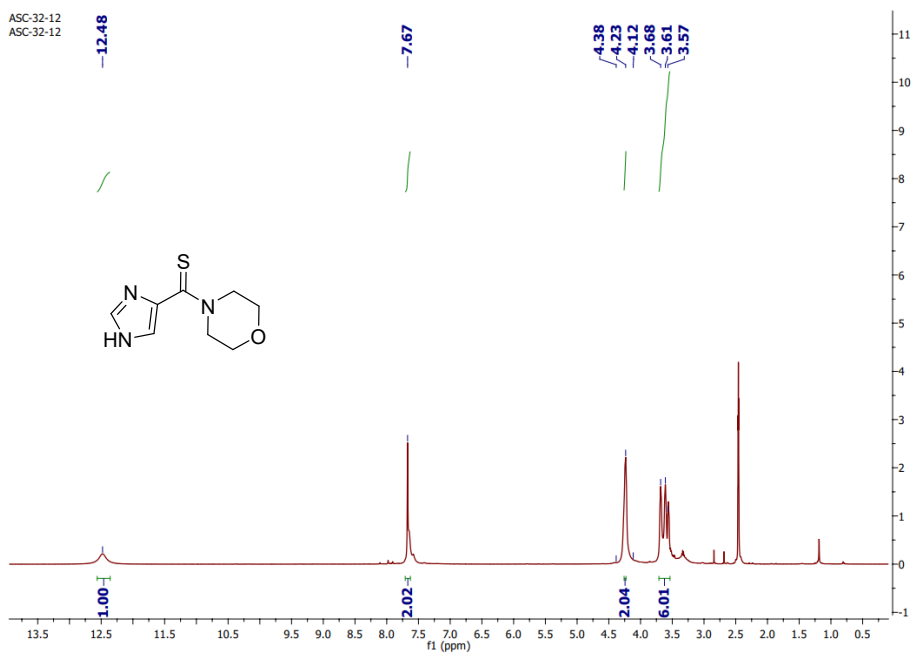

Figure S16.  $^1\text{H}$  NMR ( $\text{CDCl}_3$ ) of 12.

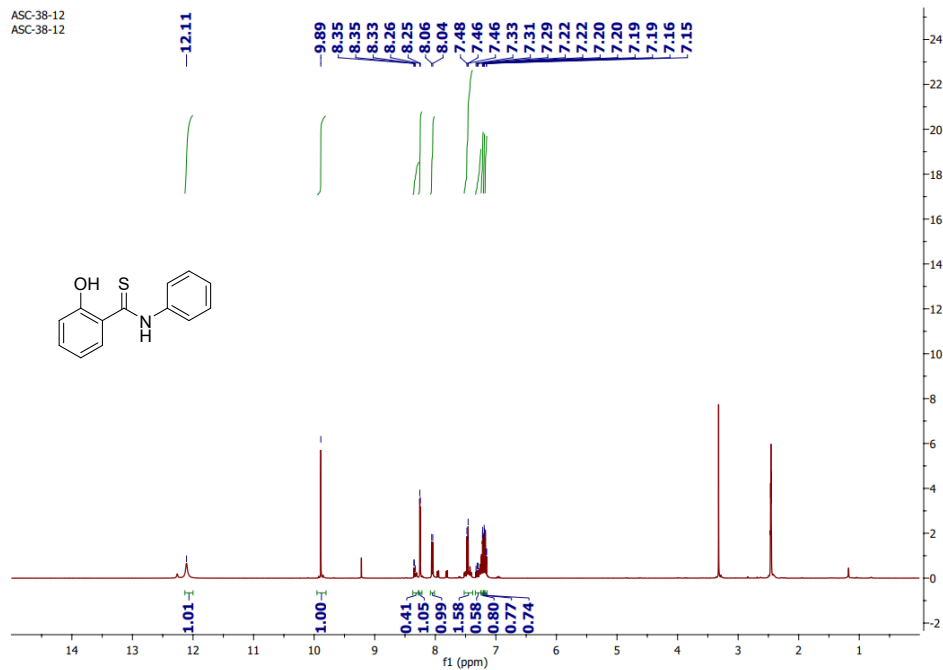

Figure S17.  $^1\text{H}$  NMR ( $\text{CDCl}_3$ ) of 13.

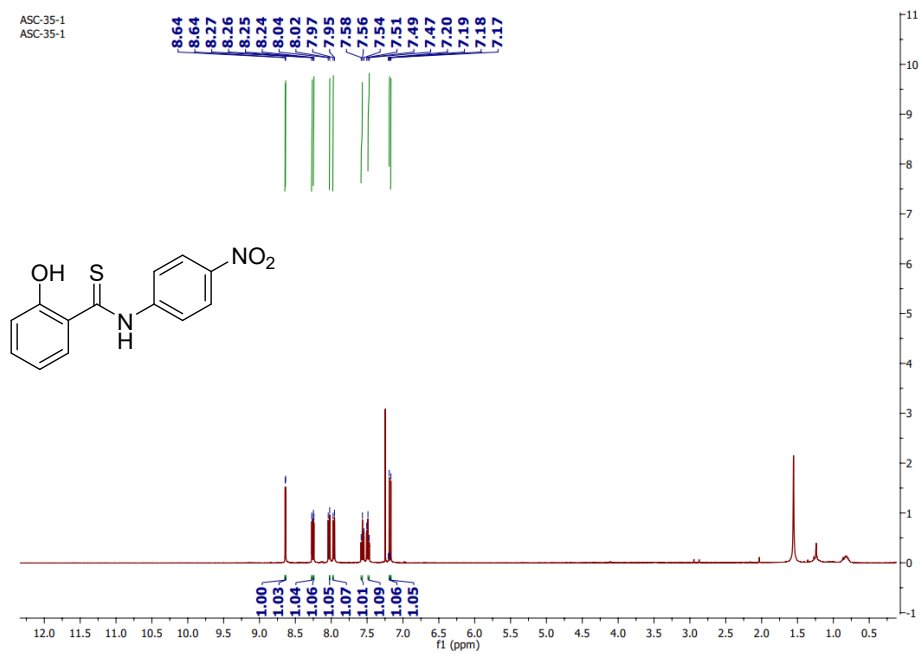

Figure S18.  $^1\text{H}$  NMR ( $\text{CDCl}_3$ ) of 14.

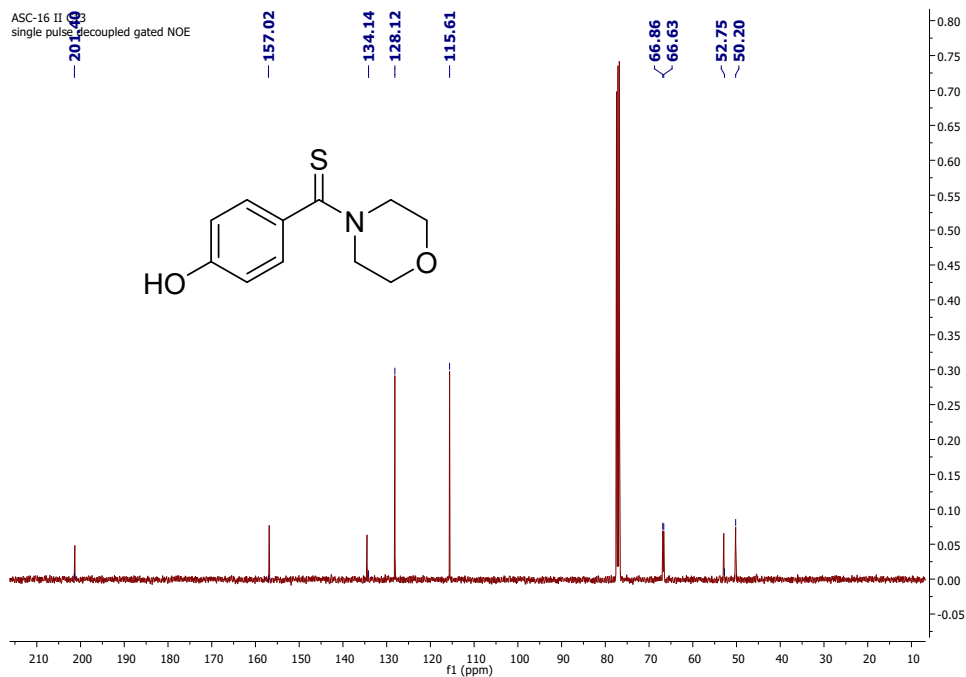

Figure S19.  $^{13}\text{C}$  NMR ( $\text{CDCl}_3$ ) of 1.

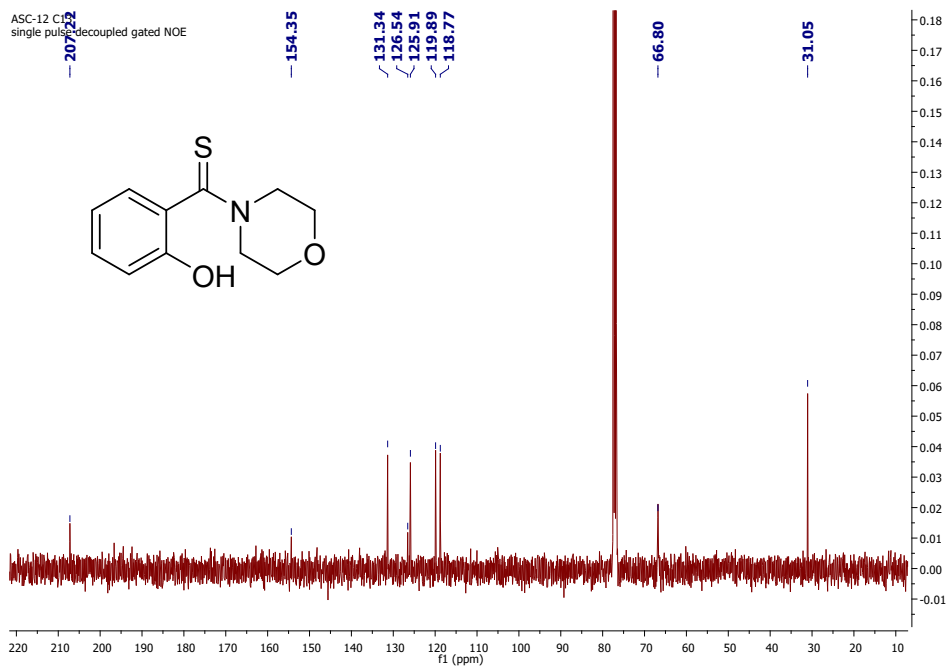

Figure S20.  $^{13}\text{C}$  NMR ( $\text{CDCl}_3$ ) of 2.

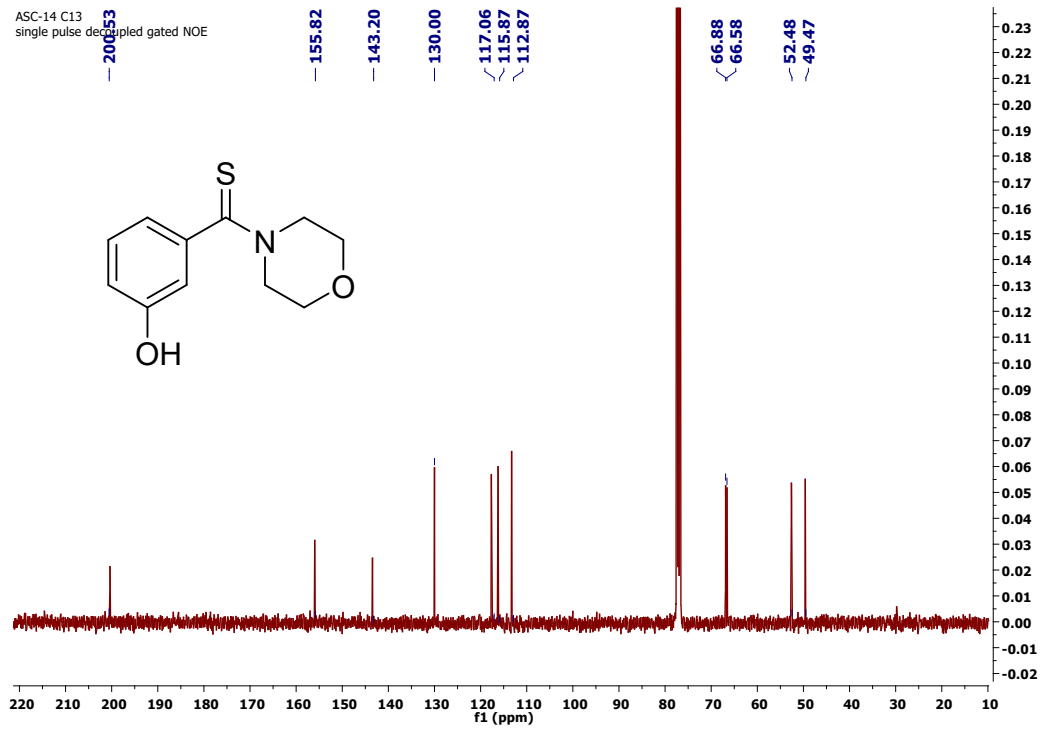

Figure S21.  $^{13}\text{C}$  NMR ( $\text{CDCl}_3$ ) of 3.

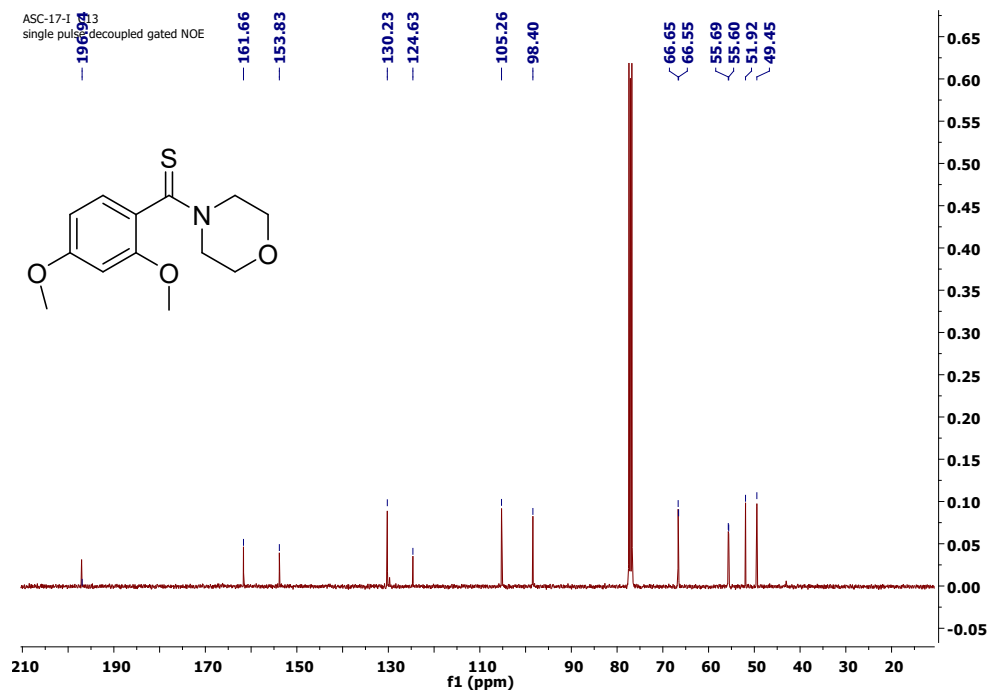

Figure S22.  $^{13}\text{C}$  NMR ( $\text{CDCl}_3$ ) of 4.

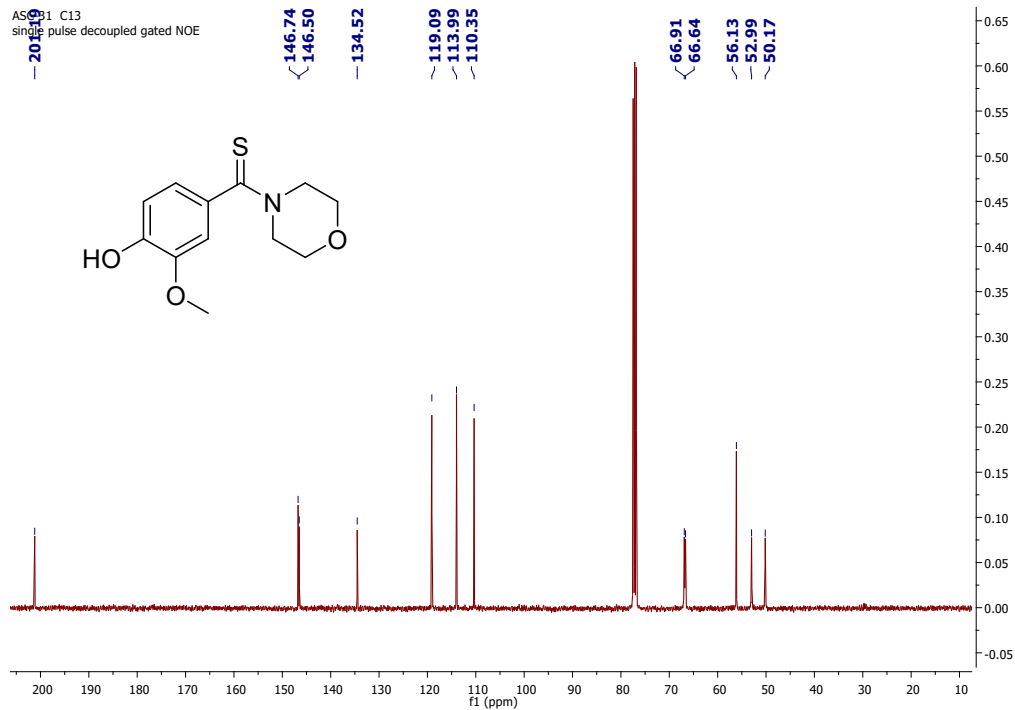

Figure S23.  $^{13}\text{C}$  NMR ( $\text{CDCl}_3$ ) of 5.

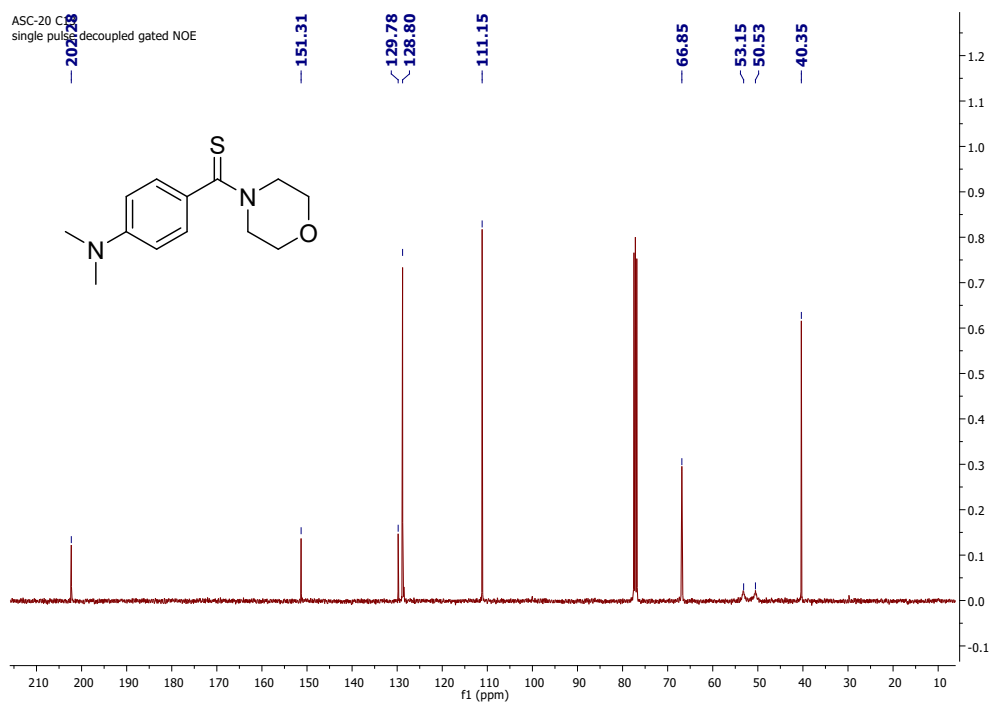

Figure S24.  $^{13}\text{C}$  NMR ( $\text{CDCl}_3$ ) of 6.

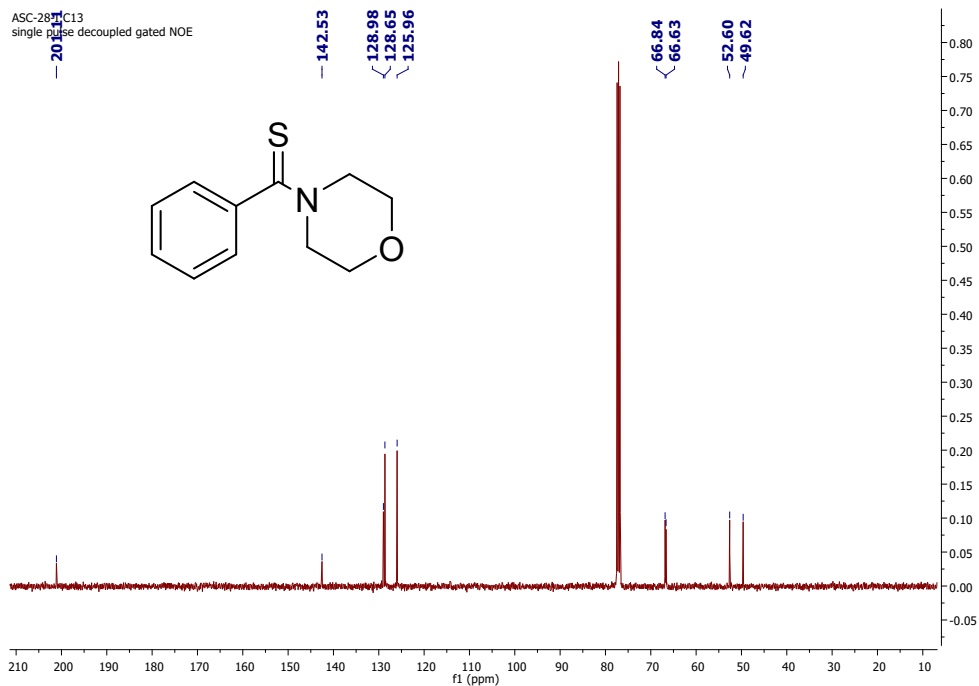

Figure S25.  $^{13}\text{C}$  NMR ( $\text{CDCl}_3$ ) of 7.

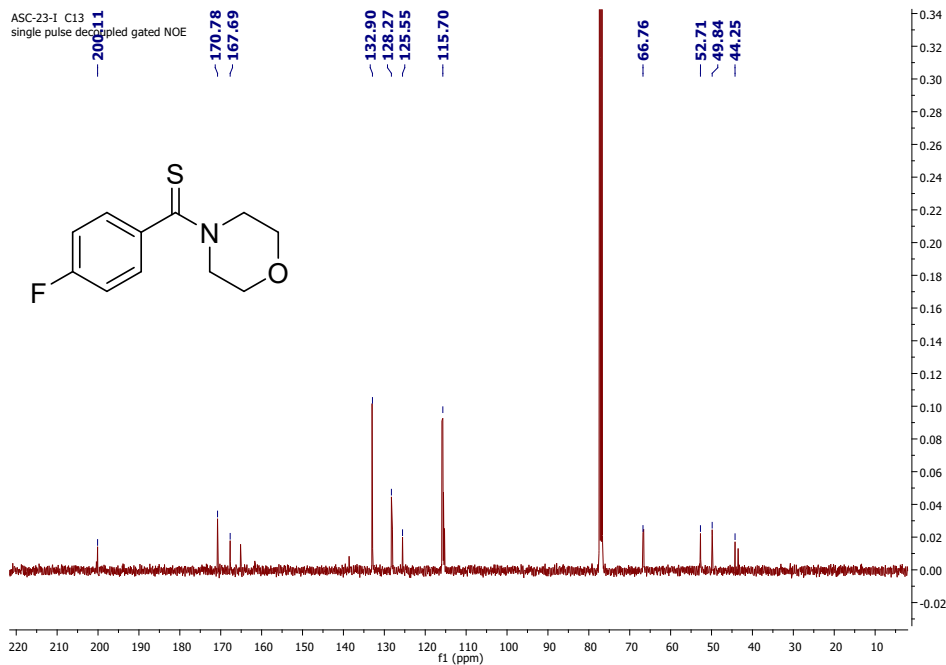

Figure S26.  $^{13}\text{C}$  NMR ( $\text{CDCl}_3$ ) of 8.

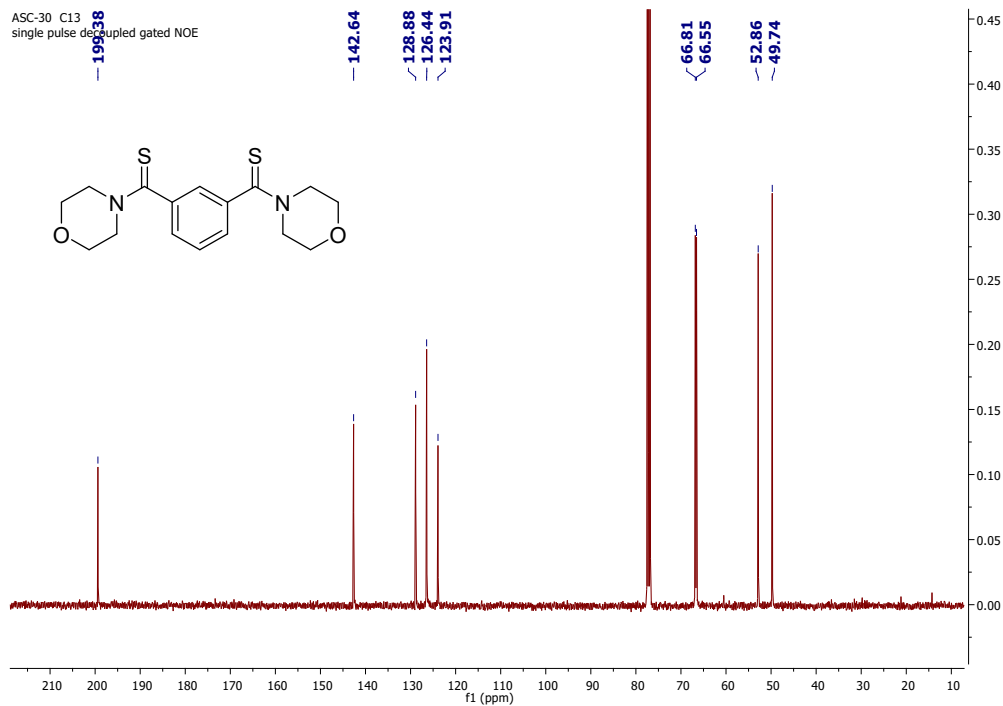

**Figure S27.**  $^{13}\text{C}$  NMR ( $\text{CDCl}_3$ ) of **9**.

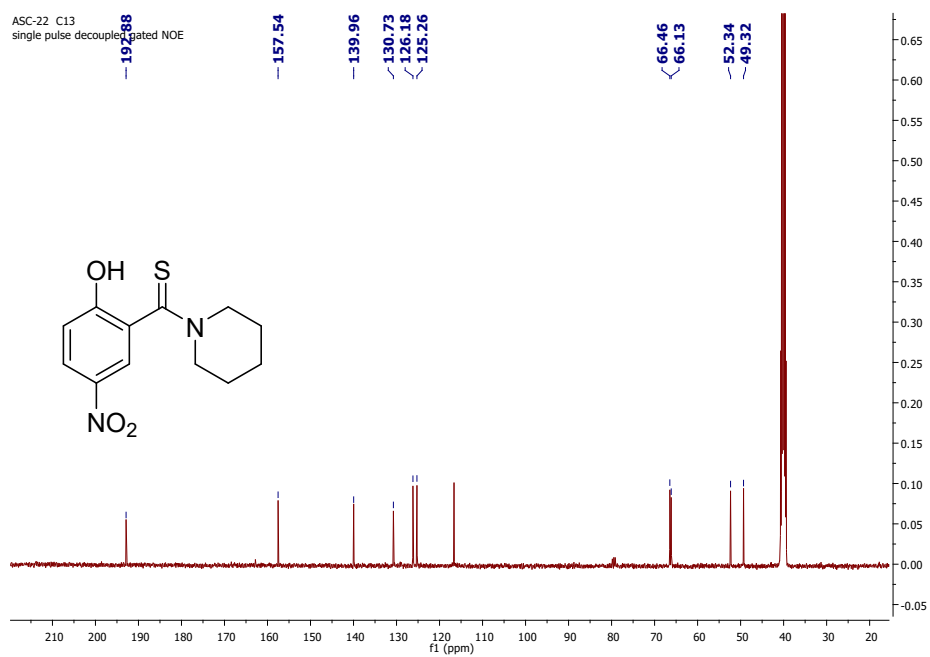

**Figure S28.**  $^{13}\text{C}$  NMR ( $\text{CDCl}_3$ ) of **10**.

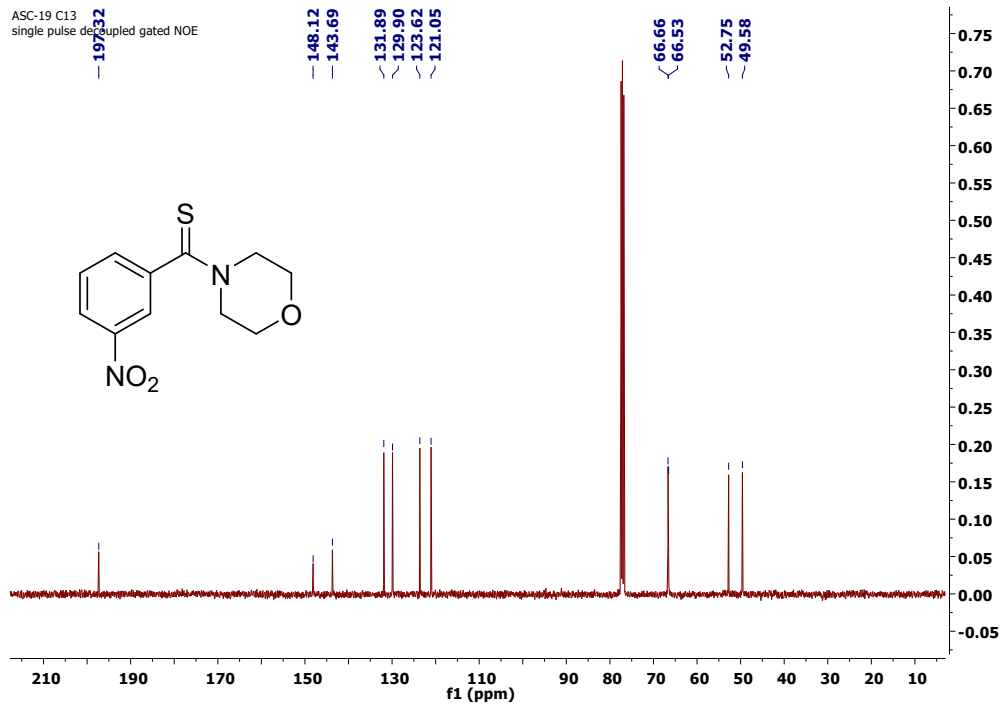

Figure S29.  $^{13}\text{C}$  NMR ( $\text{CDCl}_3$ ) of 11.

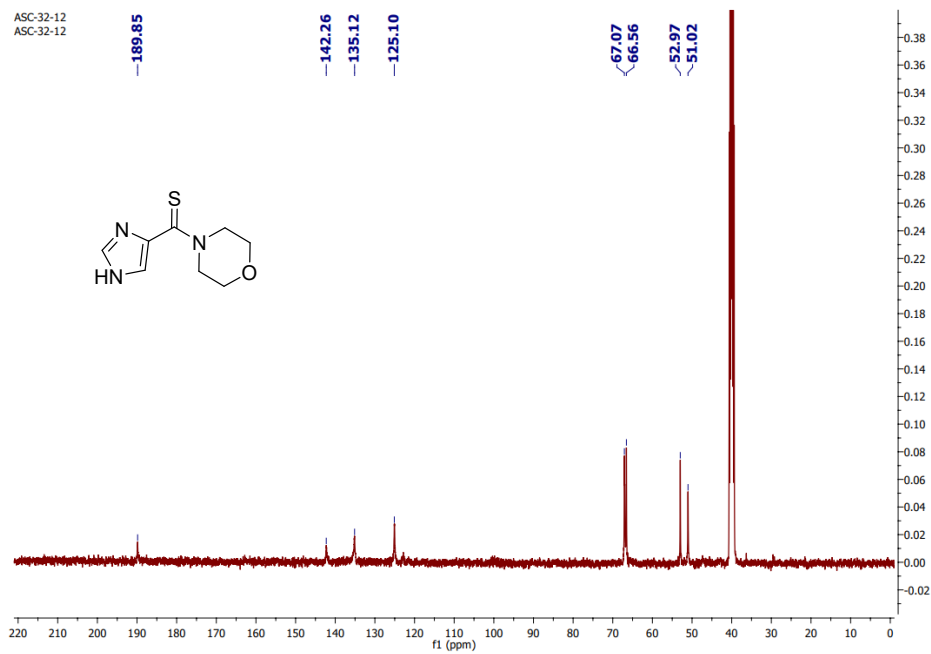

Figure S30.  $^{13}\text{C}$  NMR ( $\text{CDCl}_3$ ) of 12.



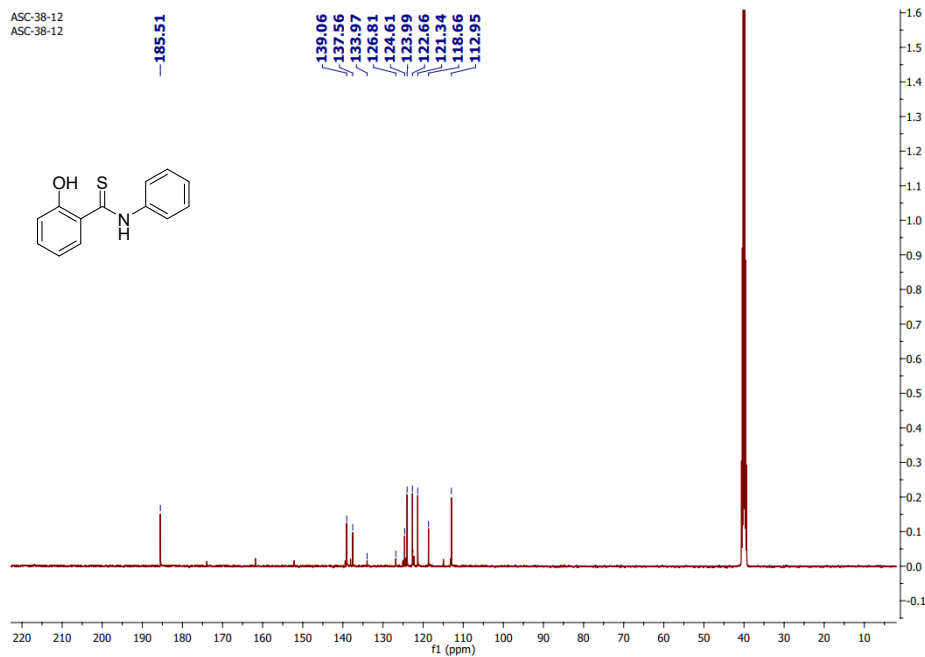

Figure S31.  $^{13}\text{C}$  NMR ( $\text{CDCl}_3$ ) of 13.

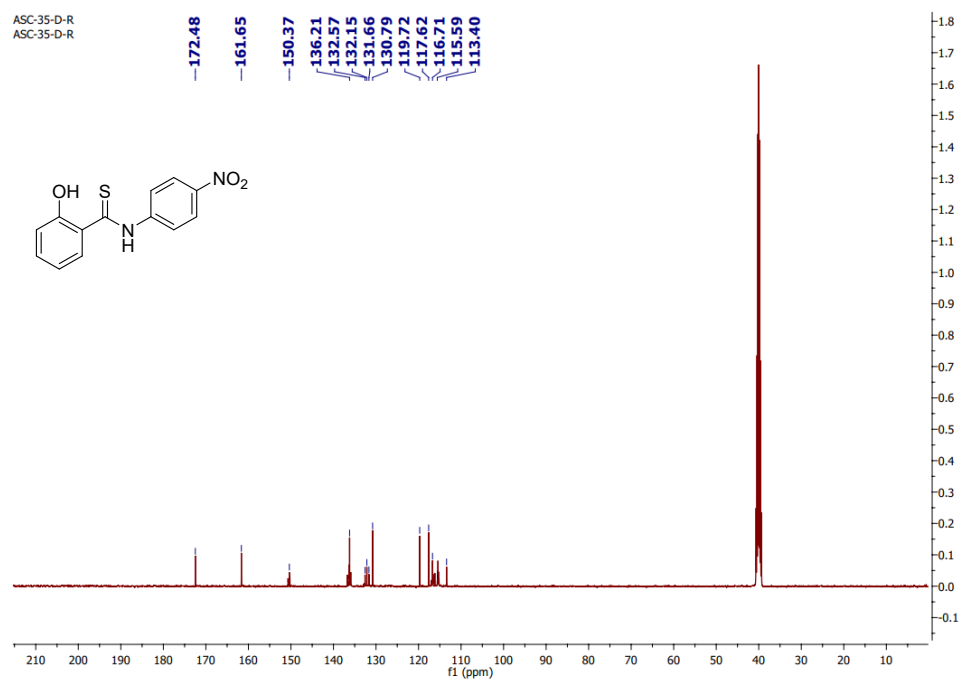

Figure S32.  $^{13}\text{C}$  NMR ( $\text{CDCl}_3$ ) of 14.

Monoisotopic Mass, Even Electron Ions

47 formula(e) evaluated with 1 results within limits (up to 50 best isotopic matches for each mass)

Elements Used:

C: 8-25 H: 11-30 N: 0-2 O: 0-4 S: 0-1

Sample Name : ASC-16

IITRPR

XEVO G2-XS QTOF

Test Name : HRMS-1

101219-ASC-16- 18 (0.183) AM2 (Ar,22000.0,0.00,0.00); Cm (18:20)

1: TOF MS ES+  
2.10e+007

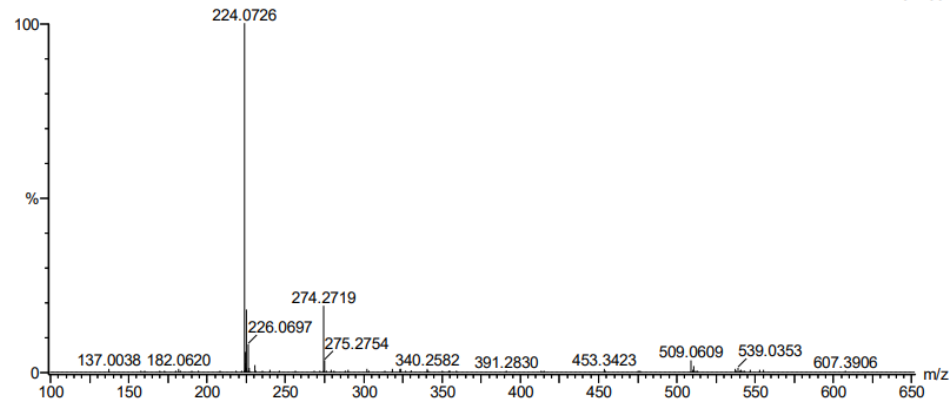

Minimum: -1.5  
Maximum: 5.0 50.0 50.0

| Mass     | Calc. Mass | mDa  | PPM  | DBE | i-FIT  | Norm | Conf (%) | Formula        |
|----------|------------|------|------|-----|--------|------|----------|----------------|
| 224.0726 | 224.0745   | -1.9 | -8.5 | 5.5 | 1078.6 | n/a  | n/a      | C11 H14 N O2 S |

Figure S33. HRMS of 1.

Monoisotopic Mass, Even Electron Ions

53 formula(e) evaluated with 1 results within limits (up to 50 best isotopic matches for each mass)

Elements Used:

C: 9-45 H: 7-50 N: 0-3 O: 1-3 S: 0-1

Sample Name : SS-ASC-12

IITRPR

XEVO G2-XS QTOF

Test Name : HRMS-1

221119-SS-ASC-12- 12 (0.131) AM2 (Ar,22000.0,0.00,0.00); Cm (8:18)

1: TOF MS ES+  
1.33e+008

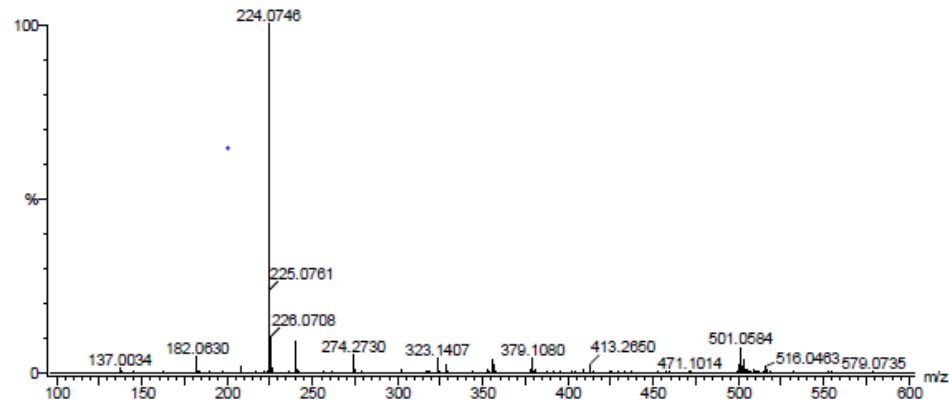

Minimum: -1.5  
Maximum: 5.0 5.0 50.0

| Mass     | Calc. Mass | mDa | PPM | DBE | i-FIT  | Norm | Conf (%) | Formula        |
|----------|------------|-----|-----|-----|--------|------|----------|----------------|
| 224.0746 | 224.0745   | 0.1 | 0.4 | 5.5 | 1294.6 | n/a  | n/a      | C11 H14 N O2 S |

Figure S34. HRMS of 2.

Monoisotopic Mass, Even Electron Ions

84 formula(e) evaluated with 1 results within limits (up to 50 best isotopic matches for each mass)

Elements Used:

C: 11-20 H: 11-35 N: 0-4 O: 1-4 Na: 0-1 S: 0-1

Sample Name : ASC-14 IITRPR

XEVO G2-XS QTOF

Test Name : HRMS-1

1: TOF MS ES+

051219-ASC-14- 20 (0.211) AM (Top,4, Ar,10000.0,0.00,0.00); Cm (20:23)

2.52e+007

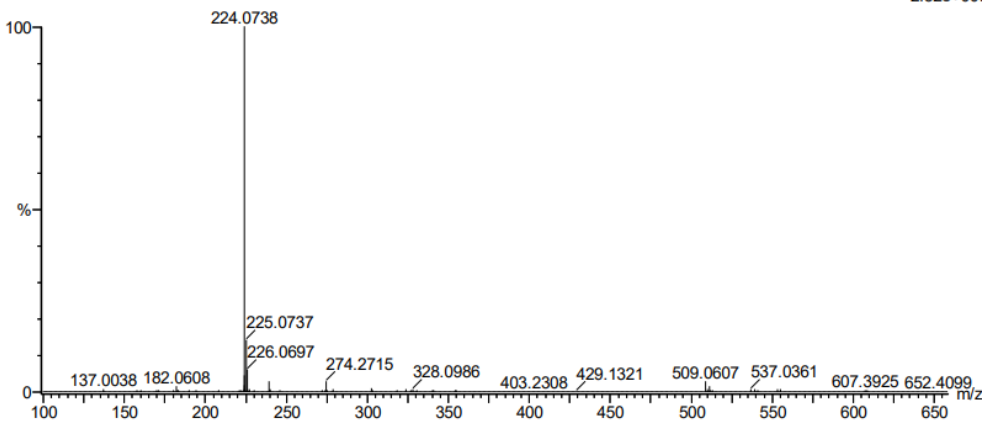

Minimum: -1.5  
Maximum: 5.0 10.0 50.0

| Mass     | Calc. Mass | mDa  | PPM  | DBE | i-FIT | Norm | Conf (%) | Formula        |
|----------|------------|------|------|-----|-------|------|----------|----------------|
| 224.0738 | 224.0745   | -0.7 | -3.1 | 5.5 | 937.6 | n/a  | n/a      | C11 H14 N O2 S |

Figure S35. HRMS of 3.

Monoisotopic Mass, Even Electron Ions

51 formula(e) evaluated with 1 results within limits (up to 50 best isotopic matches for each mass)

Elements Used:

C: 8-25 H: 11-30 N: 0-2 O: 0-4 S: 0-1

Sample Name : ASC-17 IITRPR

XEVO G2-XS QTOF

Test Name : HRMS-1

1: TOF MS ES+

101219-ASC-17- 19 (0.203) AM2 (Ar,22000.0,0.00,0.00); Cm (19:20)

2.91e+007

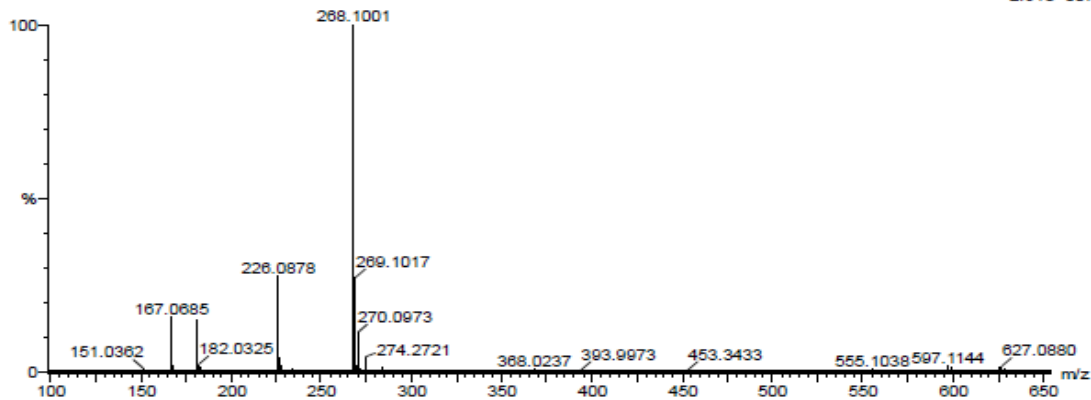

Minimum: -1.5  
Maximum: 5.0 5.0 50.0

| Mass     | Calc. Mass | mDa  | PPM  | DBE | i-FIT  | Norm | Conf (%) | Formula        |
|----------|------------|------|------|-----|--------|------|----------|----------------|
| 268.1001 | 268.1007   | -0.6 | -2.2 | 5.5 | 1109.0 | n/a  | n/a      | C13 H18 N O3 S |

Figure S36. HRMS of 4.

Monoisotopic Mass, Even Electron Ions

35 formula(e) evaluated with 1 results within limits (up to 50 best isotopic matches for each mass)

Elements Used:

C: 9-25 H: 13-25 N: 0-2 O: 0-3 S: 0-2

Sample Name : ASC-31

IITRPR

XEVO G2-XS QTOF

Test Name : HRMS-1

210120-ASC-31- 17 (0.174)

1: TOF MS ES+  
2.24e+007

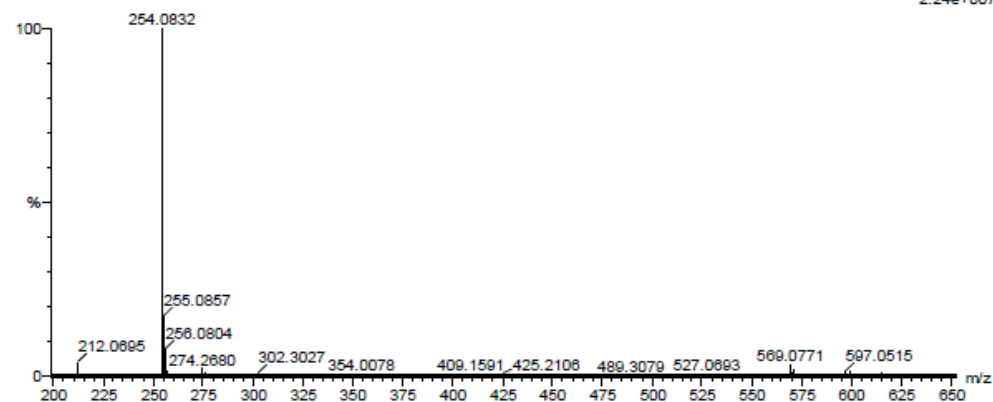

Minimum: -1.5  
Maximum: 5.0 10.0 50.0

| Mass     | Calc. Mass | mDa  | PPM  | DBE | i-FIT  | Norm | Conf (%) | Formula        |
|----------|------------|------|------|-----|--------|------|----------|----------------|
| 254.0832 | 254.0851   | -1.9 | -7.5 | 5.5 | 1739.1 | n/a  | n/a      | C12 H16 N O3 S |

Figure S37. HRMS of 5.

Monoisotopic Mass, Even Electron Ions

83 formula(e) evaluated with 1 results within limits (up to 50 best isotopic matches for each mass)

Elements Used:

C: 11-30 H: 11-35 N: 0-3 O: 0-5 S: 0-1

Sample Name : ASC-20

IITRPR

XEVO G2-XS QTOF

Test Name : HRMS-1

171219-ASC-20- 18 (0.183) AM2 (Ar,22000.0,0.00,0.00); Cm (18:21)

1: TOF MS ES+  
3.11e+007

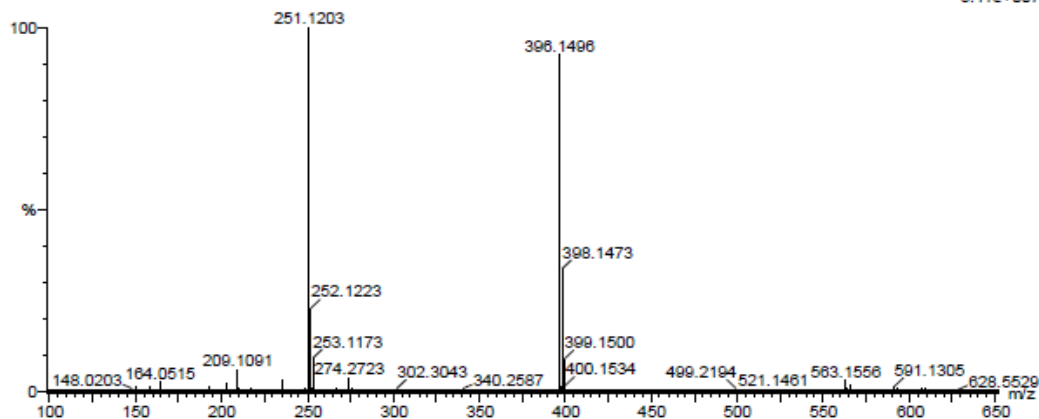

Minimum: -1.5  
Maximum: 5.0 7.0 50.0

| Mass     | Calc. Mass | mDa  | PPM  | DBE | i-FIT  | Norm | Conf (%) | Formula        |
|----------|------------|------|------|-----|--------|------|----------|----------------|
| 251.1203 | 251.1218   | -1.5 | -6.0 | 5.5 | 1080.2 | n/a  | n/a      | C13 H19 N2 O S |

Figure S38. HRMS of 6.

Monoisotopic Mass, Even Electron Ions  
 47 formula(e) evaluated with 1 results within limits (up to 50 best isotopic matches for each mass)  
 Elements Used:  
 C: 10-30 H: 11-35 N: 0-3 O: 0-2 S: 0-2  
 Sample Name : ASC-28 IITRPR XEVO G2-XS QTOF  
 Test Name : HRMS-1 1: TOF MS ES+  
 070120-ASC-28 16 (0.165) 4.60e+007

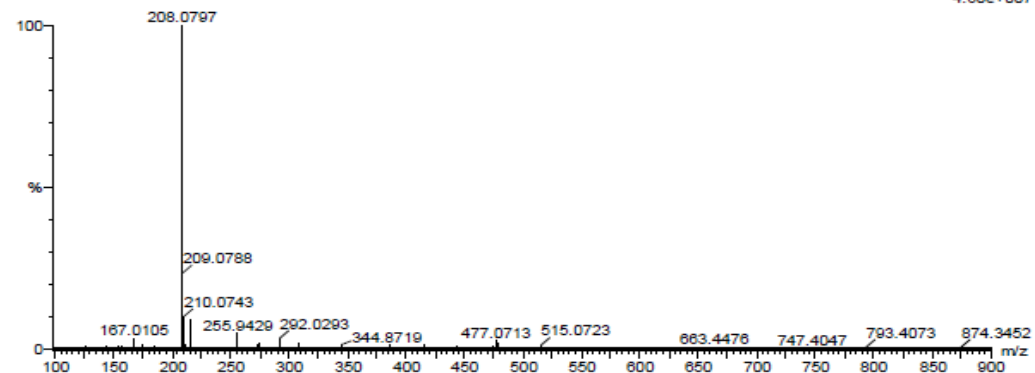

| Mass     | Calc. Mass | mDa | PPM | DBE | i-FIT  | Norm | Conf(%) | Formula       |
|----------|------------|-----|-----|-----|--------|------|---------|---------------|
| 208.0797 | 208.0796   | 0.1 | 0.5 | 5.5 | 2682.5 | n/a  | n/a     | C11 H14 N O S |

Figure S39. HRMS of 7.

Monoisotopic Mass, Odd and Even Electron Ions  
 350 formula(e) evaluated with 1 results within limits (up to 50 best isotopic matches for each mass)  
 Elements Used:  
 C: 11-30 H: 11-35 N: 0-2 O: 0-5 F: 0-4 S: 0-3  
 Sample Name : ASC-23 IITRPR XEVO G2-XS QTOF  
 Test Name : HRMS-1 1: TOF MS ES+  
 261219-ASC-23- 17 (0.174) 2.89e+007

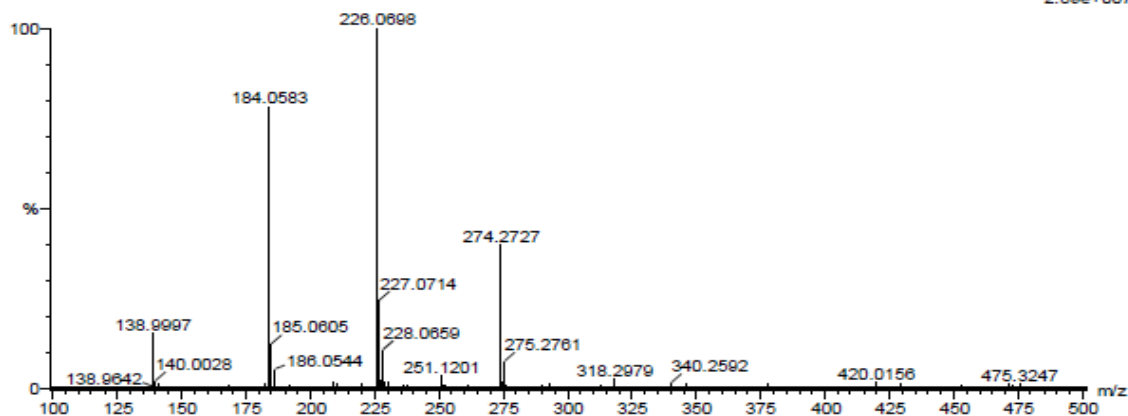

| Mass     | Calc. Mass | mDa  | PPM  | DBE | i-FIT  | Norm | Conf(%) | Formula         |
|----------|------------|------|------|-----|--------|------|---------|-----------------|
| 226.0698 | 226.0702   | -0.4 | -1.8 | 5.5 | 1950.2 | n/a  | n/a     | C11 H13 N O F S |

Figure S40. HRMS of 8.

Monoisotopic Mass, Even Electron Ions  
 47 formula(e) evaluated with 1 results within limits (up to 50 best isotopic matches for each mass)  
 Elements Used:  
 C: 9-25 H: 18-30 N: 0-3 O: 0-3 S: 0-2  
 Sample Name : ASC-30 IITRPR XEVO G2-XS QTOF  
 Test Name : HRMS-1  
 170120-ASC-30- 18 (0.183) 1: TOF MS ES+  
 3.24e+007

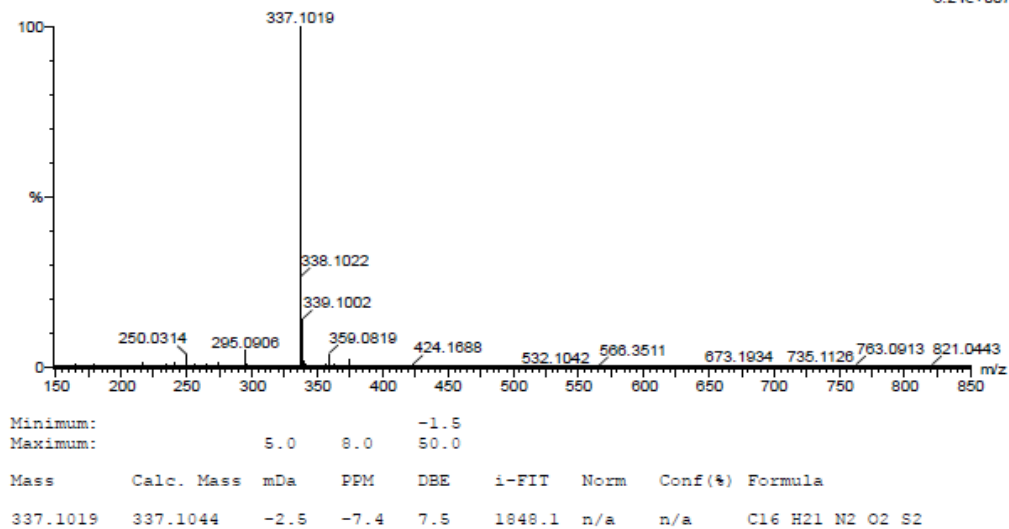

Figure S41. HRMS of 9.

Monoisotopic Mass, Even Electron Ions  
 93 formula(e) evaluated with 1 results within limits (up to 50 best isotopic matches for each mass)  
 Elements Used:  
 C: 11-30 H: 10-35 N: 0-3 O: 0-5 S: 0-1  
 Sample Name : ASC-22 IITRPR XEVO G2-XS QTOF  
 Test Name : HRMS-1  
 201219-ASC-22 14 (0.148) 1: TOF MS ES+  
 4.00e+007

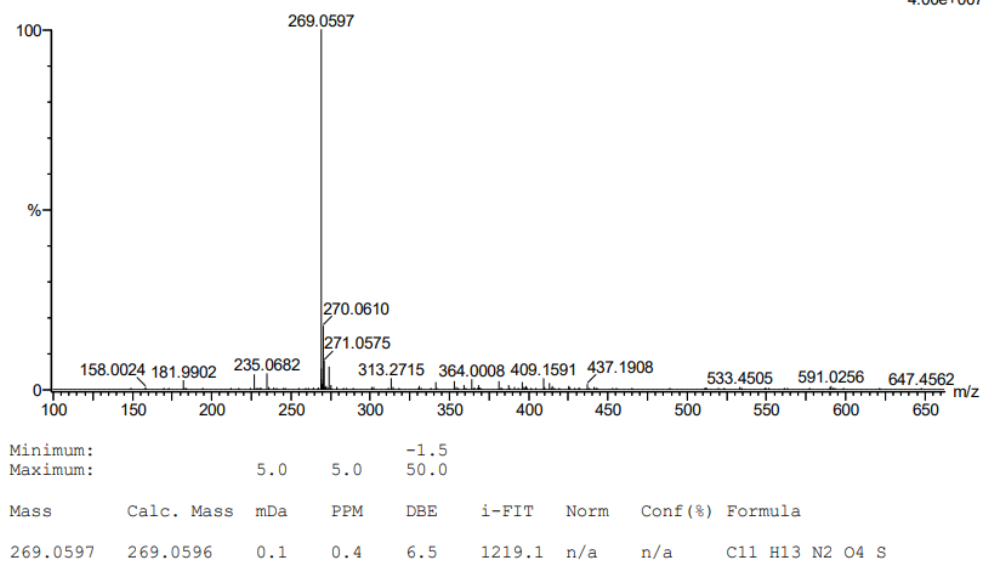

Figure S42. HRMS of 10.

Monoisotopic Mass, Even Electron Ions  
 78 formula(e) evaluated with 1 results within limits (up to 50 closest results for each mass)  
 Elements Used:  
 C: 8-35 H: 10-45 N: 0-2 O: 0-4 S: 0-1  
 Sample Name : ASC-19 IITRPR XEVO G2-XS QTOF  
 Test Name : HRMS-1  
 121219-ASC-19 16 (0.165) AM2 (Ar,22000.0,0.00,0.00); Cm (16:21) 1: TOF MS ES+  
 2.38e+007

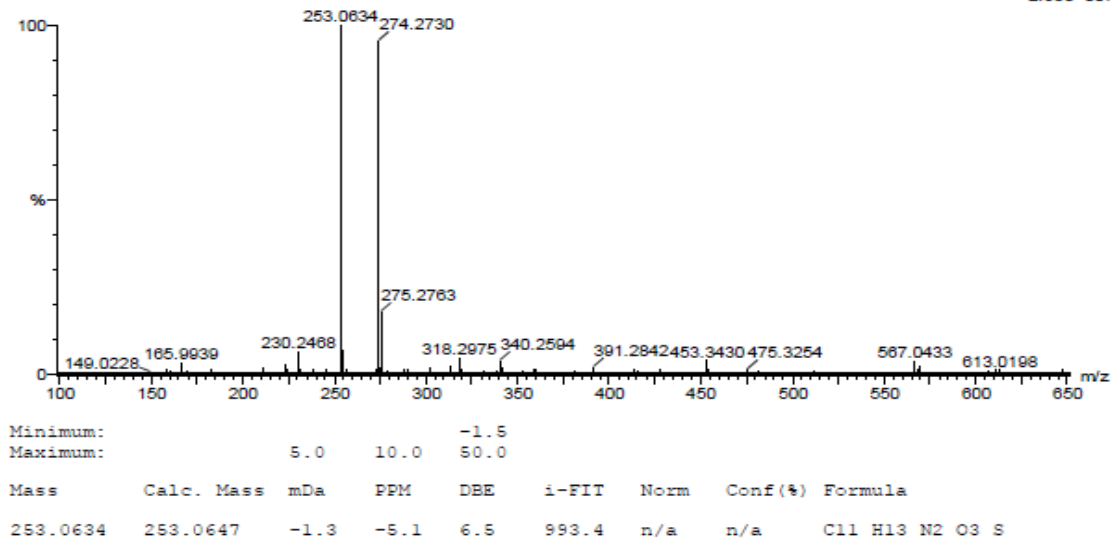

Figure S43. HRMS of 11.

Monoisotopic Mass, Odd and Even Electron Ions  
 43 formula(e) evaluated with 1 results within limits (up to 50 best isotopic matches for each mass)  
 Elements Used:  
 C: 8-25 H: 11-25 N: 0-3 O: 0-3 S: 0-2  
 Sample Name : ASC-32 IITRPR XEVO G2-XS QTOF  
 Test Name : HRMS-1  
 210120-ASC-32- 16 (0.165) 1: TOF MS ES+  
 2.68e+007

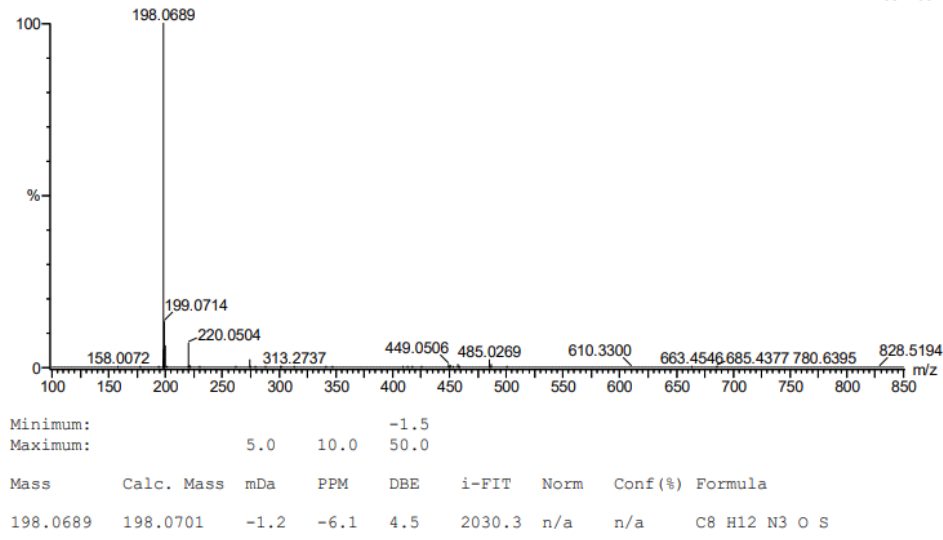

Figure S44. HRMS of 12.

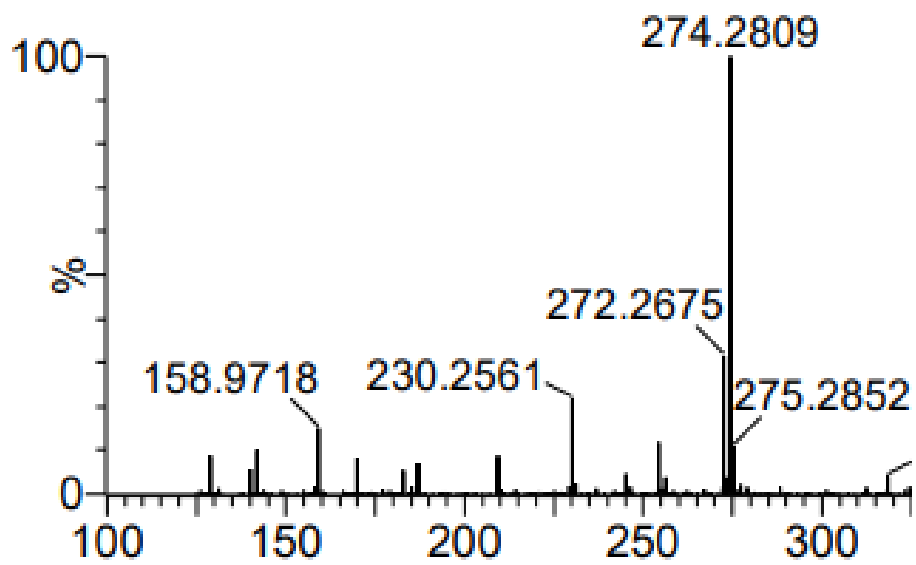

Figure S45. HRMS of 13.

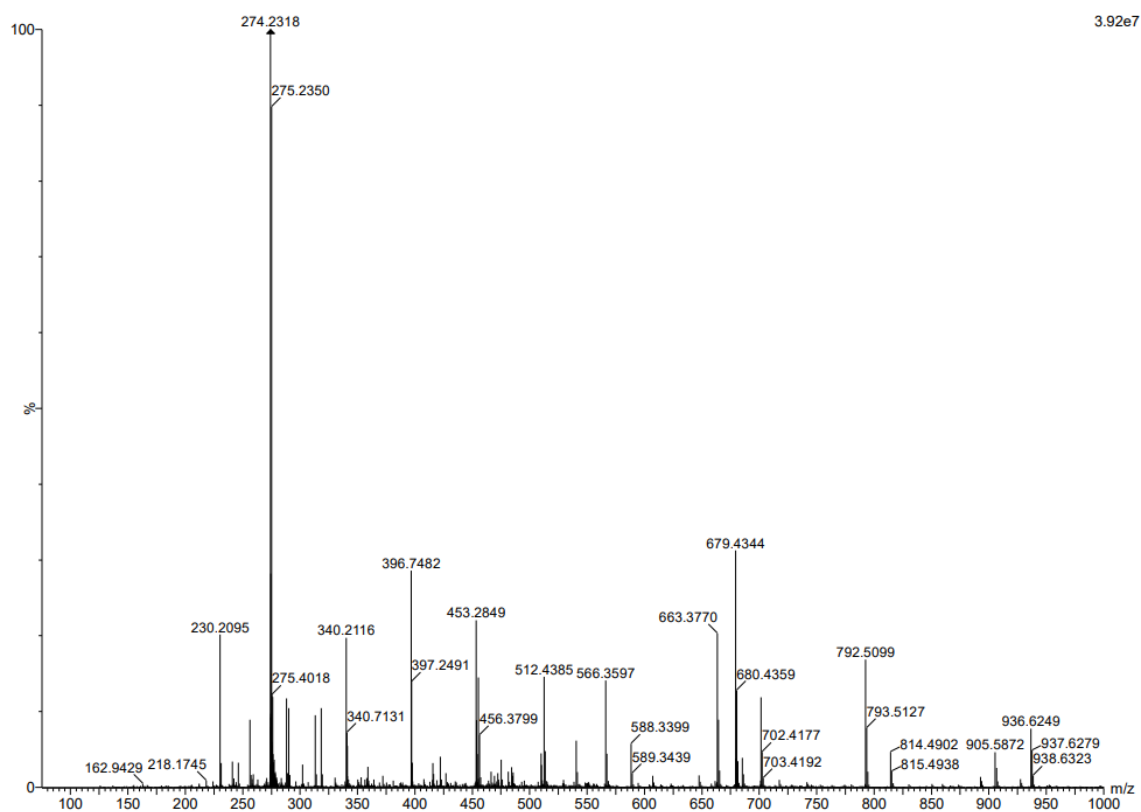

Figure S46. HRMS of 14.



**Table S1.** Impact energies of the AgNPs@cellulose–PEVA hybrid catalyst in the Izod and Charpy modes. Here, AgNPs and PEVA denote Ag nanoparticles and poly(ethylene-co-vinyl acetate), respectively.

| Entry | Mode   | Energy (kJ/m) | Degree |
|-------|--------|---------------|--------|
| 1     | Izod   | 1.865         | 123    |
| 2     | Charpy | 5.939         | 81     |

**Table S2.** Yields of several reported catalysts for the synthesis of thioamides. Here, AgNPs and PEVA denote Ag nanoparticles and poly(ethylene-co-vinyl acetate), respectively.

| Entry | Catalyst                                     | Time (h) | Yield (%) | Reference  |
|-------|----------------------------------------------|----------|-----------|------------|
| 1     | Pyridine                                     | 24       | 86        | 1          |
| 2     | -                                            | 70       | 68        | 2          |
| 3     | Metal complex                                | 18       | 82        | 3          |
| 4     | K <sub>2</sub> S <sub>2</sub> O <sub>8</sub> | 4        | 51        | 4          |
| 5     | AgNPs@cellulose–PEVA                         | 2.5      | 98        | This study |

#### References

1. T. B. Nguyen, M. Q. Tran, L. Ermolenko, A. Al-Mourabit, , *Org. Lett.*, 2014, **16**, 310–313. DOI:[10.1021/ol403345e](https://doi.org/10.1021/ol403345e).
2. M. Patra, J. Hess, S. Konatschnig, B. Spingler, G. Gasser, , *Organometallics*, 2013, **32**, 6098–6105. DOI:[10.1021/om400715m](https://doi.org/10.1021/om400715m).
3. X. Wang, M. Ji, S. Lim, H. Y. Jang, , *J. Org. Chem.*, 2014, **79**, 7256–7260. DOI:[10.1021/jo501378v](https://doi.org/10.1021/jo501378v).
4. J. Wei, Y. Li, X. Jiang, , *Org. Lett.*, 2016, **18**, 340–343. DOI:[10.1021/acs.orglett.5b03541](https://doi.org/10.1021/acs.orglett.5b03541).
